# Supplementary material for: Photoelectron spectroscopy and density functional study of ConC2− (n = 1–5) clusters
Source: Royal Society of Chemistry journal article supplement (doi:10.1039/c3cp54758b), 2013-12-23
Supplement: c3cp54758b.pdf [file c3cp54758b.pdf]

# Supplementary Materials

## Photoelectron Spectroscopy and Density Functional Study of $\text{Co}_n\text{C}_2^-$ ( $n=1-5$ ) Clusters

Jinyun Yuan<sup>1,2</sup>, Hong-Guang Xu<sup>1</sup>, Weijun Zheng<sup>1\*</sup>

<sup>1</sup> *Beijing National Laboratory for Molecular Sciences, State Key Laboratory of Molecular Reaction Dynamics, Institute of Chemistry, Chinese Academy of Sciences, Beijing 100190, China*

<sup>2</sup> *Institute of Nanostructured Functional Materials, Huanghe Science and Technology College, Zhengzhou, Henan 450006, China*

\* Corresponding author. E-mail: [zhengwj@iccas.ac.cn](mailto:zhengwj@iccas.ac.cn)

### Contents:

- 1. Cartesian Coordinates of  $\text{Co}_n\text{C}_2^-$  ( $n=1-5$ ) clusters anions in the article.**
- 2. Cartesian Coordinates of  $\text{Co}_n\text{C}_2$  ( $n=1-5$ ) clusters neutrals in the article.**

## 1. Cartesian Coordinates of $\text{Co}_n\text{C}_2^-$ ( $n=1-5$ ) clusters anions in the article.

1A

|    |            |             |             |
|----|------------|-------------|-------------|
| C  | 0.00000000 | 0.66436200  | -1.20244300 |
| C  | 0.00000000 | -0.66436200 | -1.20244300 |
| Co | 0.00000000 | 0.00000000  | 0.53441900  |

1B

|    |            |            |             |
|----|------------|------------|-------------|
| C  | 0.00000000 | 0.00000000 | -1.03018000 |
| C  | 0.00000000 | 0.00000000 | -2.31480500 |
| Co | 0.00000000 | 0.00000000 | 0.74333000  |

1C

|    |            |             |             |
|----|------------|-------------|-------------|
| C  | 0.00000000 | 0.65799000  | -1.24550600 |
| C  | 0.00000000 | -0.65799000 | -1.24550600 |
| Co | 0.00000000 | 0.00000000  | 0.55355800  |

2A

|    |             |             |            |
|----|-------------|-------------|------------|
| C  | 1.17288500  | -0.57397600 | 0.00000000 |
| C  | 1.82482400  | 0.56352800  | 0.00000000 |
| Co | -0.66615800 | -1.04307100 | 0.00000000 |
| Co | 0.00000000  | 1.04539300  | 0.00000000 |

2B

|    |             |             |            |
|----|-------------|-------------|------------|
| C  | 1.03129000  | -0.51323300 | 0.00000000 |
| C  | 1.82092300  | 0.54618500  | 0.00000000 |
| Co | -0.63382500 | -1.11976000 | 0.00000000 |
| Co | 0.00000000  | 1.11243700  | 0.00000000 |

2C

|    |            |             |             |
|----|------------|-------------|-------------|
| C  | 0.00000000 | 0.63674700  | 0.00011400  |
| C  | 0.00000000 | -0.63674700 | 0.00011400  |
| Co | 0.00000000 | 2.39712400  | -0.00002500 |
| Co | 0.00000000 | -2.39712400 | -0.00002500 |

3A

|    |             |             |             |
|----|-------------|-------------|-------------|
| Co | -0.63821100 | -0.95434200 | -0.13200600 |
| Co | 1.54420700  | -0.36233000 | 0.10362500  |
| Co | 0.02343100  | 1.23792600  | -0.08712600 |
| C  | -1.73632900 | 0.72313300  | 0.25559200  |
| C  | -2.44609600 | -0.36877300 | 0.26418400  |

3B

|   |             |            |            |
|---|-------------|------------|------------|
| C | -0.04247300 | 1.09656800 | 0.66812100 |
|---|-------------|------------|------------|

|           |             |             |             |
|-----------|-------------|-------------|-------------|
| C         | -0.04247300 | 1.09656800  | -0.66812100 |
| Co        | -0.04247300 | 0.11863700  | -2.17772500 |
| Co        | 0.10382400  | -0.72463700 | 0.00000000  |
| Co        | -0.04247300 | 0.11863700  | 2.17772500  |
| <b>3C</b> |             |             |             |
| C         | 0.07843600  | 1.03888600  | 0.66350300  |
| C         | 0.07843600  | 1.03888600  | -0.66350300 |
| Co        | 0.07843600  | 0.15542100  | -2.17720200 |
| Co        | -0.19173200 | -0.77257000 | 0.00000000  |
| Co        | 0.07843600  | 0.15542100  | 2.17720200  |
| <b>3D</b> |             |             |             |
| C         | -1.31891100 | -0.00127500 | 1.14967000  |
| C         | 0.03305000  | -0.00074200 | 1.25881700  |
| Co        | 1.44542900  | 0.00037500  | 0.00857700  |
| Co        | -0.58022400 | 1.13204400  | -0.27165500 |
| Co        | -0.57945700 | -1.13197100 | -0.27214100 |
| <b>4A</b> |             |             |             |
| C         | -2.13499400 | 0.01984900  | -0.17880000 |
| C         | -1.24313900 | 0.97507000  | -0.49136600 |
| Co        | 0.58774300  | 1.26800200  | -0.42344200 |
| Co        | -0.50376400 | -0.87090000 | -0.93705200 |
| Co        | -0.72652300 | 0.02071400  | 1.20142400  |
| Co        | 1.39324100  | -0.63890900 | 0.30799500  |
| <b>4B</b> |             |             |             |
| Co        | 0.89243300  | -0.79945700 | -0.55633800 |
| Co        | -1.36115700 | 0.45856500  | -0.72345900 |
| Co        | -0.82027700 | -1.04455800 | 0.76430600  |
| Co        | 0.23923300  | 1.27924500  | 0.49378900  |
| C         | 2.03278700  | 0.75893300  | 0.25862600  |
| C         | 2.69116400  | -0.28101400 | -0.16096600 |
| <b>4C</b> |             |             |             |
| Co        | 0.08375200  | -0.78013600 | -1.15663000 |
| C         | -2.38767200 | 0.12318100  | 0.00798200  |
| Co        | 0.10514300  | -0.76907300 | 1.16178100  |
| Co        | -0.79382000 | 1.12570100  | 0.00015600  |
| C         | -1.44066600 | -0.82116300 | 0.01649600  |
| Co        | 1.45566700  | 0.57861500  | -0.01074700 |
| <b>4D</b> |             |             |             |

|           |             |             |             |
|-----------|-------------|-------------|-------------|
| Co        | 0.82659600  | -0.97283000 | -0.00041900 |
| Co        | -1.04437600 | -0.20661800 | -1.11575600 |
| Co        | -1.04328500 | -0.20680100 | 1.11635400  |
| Co        | 0.23187000  | 1.32102800  | -0.00009800 |
| C         | 1.97513000  | 0.70660700  | 0.00005800  |
| C         | 2.65625500  | -0.41311200 | -0.00042300 |
| <b>4E</b> |             |             |             |
| Co        | -1.19701500 | -0.51745200 | 0.00000000  |
| C         | 0.36630900  | -1.58366200 | 0.66642900  |
| Co        | 0.36630900  | -0.05012300 | -1.71781400 |
| Co        | 0.36630900  | -0.05012300 | 1.71781400  |
| C         | 0.36630900  | -1.58366200 | -0.66642900 |
| Co        | 0.30159300  | 1.32154700  | 0.00000000  |
| <b>4F</b> |             |             |             |
| Co        | -0.24448800 | -0.77148600 | 1.13960000  |
| C         | -1.86480800 | -1.02192900 | 0.00000000  |
| Co        | -0.24448800 | 1.53582500  | 0.00000000  |
| Co        | -0.24448800 | -0.77148600 | -1.13960000 |
| C         | -1.66025500 | 0.29947000  | 0.00000000  |
| Co        | 1.51681100  | 0.16769400  | 0.00000000  |
| <b>4G</b> |             |             |             |
| Co        | 0.08110800  | -1.03233900 | 0.29152500  |
| Co        | 2.07406900  | -0.30639400 | -0.30875300 |
| Co        | -1.63122300 | 0.61079600  | -0.24617000 |
| C         | -2.89441000 | -0.83454100 | -0.14512300 |
| C         | -1.75361600 | -1.41991100 | 0.05696000  |
| Co        | 0.50894000  | 1.22892600  | 0.28298900  |
| <b>4H</b> |             |             |             |
| Co        | 0.23943200  | -0.67407800 | 1.22625300  |
| C         | 2.11762800  | 1.15440800  | 0.00000000  |
| Co        | 0.23943200  | -0.67407800 | -1.22625300 |
| Co        | 0.23943200  | 1.38906700  | 0.00000000  |
| C         | 1.63877500  | -0.08165600 | 0.00000000  |
| Co        | -1.55305300 | -0.27930000 | 0.00000000  |
| <b>5A</b> |             |             |             |
| Co        | -0.09652500 | -0.93878200 | -0.88645900 |
| Co        | 0.48199400  | 1.38126100  | -0.32508100 |
| Co        | 0.12611000  | -0.16800100 | 1.35050300  |
| C         | -2.08513800 | -1.31361800 | -0.31131800 |

|           |             |             |             |
|-----------|-------------|-------------|-------------|
| C         | -1.35006300 | -1.19388800 | 0.78074300  |
| Co        | 1.94384700  | -0.33654400 | -0.11574900 |
| Co        | -1.69204800 | 0.61928900  | -0.12753100 |
| <b>5B</b> |             |             |             |
| Co        | -1.94551200 | -0.33414700 | -0.11322200 |
| Co        | -0.12274500 | -0.16234100 | 1.35320200  |
| Co        | -0.47935800 | 1.37804300  | -0.33005000 |
| Co        | 1.69415200  | 0.61632200  | -0.12884900 |
| Co        | 0.09115500  | -0.93937800 | -0.88353400 |
| C         | 2.08321500  | -1.31785900 | -0.31535500 |
| C         | 1.34717000  | -1.19538800 | 0.77639500  |
| <b>5C</b> |             |             |             |
| Co        | 0.00063000  | -0.34896800 | 0.84423700  |
| Co        | -1.21871300 | 1.35114100  | -0.09491200 |
| Co        | 1.97307800  | -0.72110300 | -0.28928100 |
| C         | 0.66114300  | -2.04258800 | -0.15104700 |
| C         | -0.65484300 | -2.04559500 | -0.15146600 |
| Co        | 1.21308500  | 1.35355200  | -0.10021000 |
| Co        | -1.96947900 | -0.72613800 | -0.29260900 |
| <b>5D</b> |             |             |             |
| Co        | -2.00688600 | -0.26766300 | -0.07710400 |
| Co        | -0.15109700 | -0.14068000 | 1.35248200  |
| Co        | -0.45979200 | 1.28390400  | -0.40944400 |
| Co        | 1.79568200  | 0.56902000  | -0.05115300 |
| Co        | 0.10128600  | -0.89807400 | -0.89777000 |
| C         | 1.97778100  | -1.30916100 | -0.38499400 |
| C         | 1.26585200  | -1.15012200 | 0.75844600  |
| <b>5E</b> |             |             |             |
| Co        | -0.09999000 | -0.89903900 | -0.89623000 |
| Co        | 0.46039400  | 1.28335300  | -0.40970200 |
| Co        | 0.14916500  | -0.13928400 | 1.35277900  |
| C         | -1.97744400 | -1.31012500 | -0.38487800 |
| C         | -1.26667400 | -1.14899400 | 0.75898600  |
| Co        | 2.00698900  | -0.26766200 | -0.07670100 |
| Co        | -1.79564400 | 0.56910300  | -0.05328200 |
| <b>5F</b> |             |             |             |
| Co        | -0.23819600 | 0.34477200  | 1.09666400  |
| Co        | 1.84143000  | -0.68263100 | 0.47167900  |
| Co        | -2.12544400 | -0.43375400 | -0.04357700 |

|           |             |             |             |
|-----------|-------------|-------------|-------------|
| C         | -1.71380200 | 1.31715000  | 0.02440400  |
| C         | -0.53608800 | 1.87227400  | -0.24431400 |
| Co        | -0.02835800 | -0.99718700 | -0.76996800 |
| Co        | 1.05054400  | 1.06004000  | -0.70592900 |
| <b>5G</b> |             |             |             |
| Co        | -0.40736600 | 1.12165300  | -0.00324200 |
| Co        | -2.41827700 | 0.16188900  | 0.00675700  |
| Co        | 1.26250800  | -0.26053000 | -1.14895600 |
| C         | 2.58680600  | 0.66961600  | 0.03692400  |
| C         | 1.49060800  | 1.42686400  | 0.03035500  |
| Co        | -0.57238000 | -1.19338800 | -0.02467300 |
| Co        | 1.22942300  | -0.29550700 | 1.15516200  |

## 2. Cartesian Coordinates of $\text{Co}_n\text{C}_2$ ( $n=1-5$ ) clusters neutrals in the article.

|                        |            |             |             |
|------------------------|------------|-------------|-------------|
| <b>CoC<sub>2</sub></b> |            |             |             |
| C                      | 0.00000000 | 0.66850800  | -1.18509700 |
| C                      | 0.00000000 | -0.66850800 | -1.18509700 |
| Co                     | 0.00000000 | 0.00000000  | 0.52671000  |

|                                    |             |             |            |
|------------------------------------|-------------|-------------|------------|
| <b>Co<sub>2</sub>C<sub>2</sub></b> |             |             |            |
| C                                  | 1.04857200  | -0.53015600 | 0.00000000 |
| C                                  | 1.78982600  | 0.55777800  | 0.00000000 |
| Co                                 | -0.63075500 | -1.11388000 | 0.00000000 |
| Co                                 | 0.00000000  | 1.10774200  | 0.00000000 |

|                                    |             |             |             |
|------------------------------------|-------------|-------------|-------------|
| <b>Co<sub>3</sub>C<sub>2</sub></b> |             |             |             |
| Co                                 | -1.30340600 | 0.66721700  | 0.00000000  |
| Co                                 | 0.42179900  | -0.51534400 | 1.14306900  |
| Co                                 | 0.42179900  | -0.51534400 | -1.14306900 |
| C                                  | 1.64733800  | 0.53578300  | 0.00000000  |
| C                                  | 0.42179900  | 1.09983500  | 0.00000000  |

|                                    |             |             |             |
|------------------------------------|-------------|-------------|-------------|
| <b>Co<sub>4</sub>C<sub>2</sub></b> |             |             |             |
| C                                  | -2.09183200 | 0.16845400  | -0.01451100 |
| C                                  | -1.20172900 | 1.15971600  | -0.02045000 |
| Co                                 | 0.65148100  | 1.33306900  | -0.01492500 |
| Co                                 | -0.62545700 | -0.44954400 | -1.17134100 |
| Co                                 | -0.63972600 | -0.41524600 | 1.17955400  |
| Co                                 | 1.34560400  | -0.76342900 | 0.01448000  |

|                                    |             |             |             |
|------------------------------------|-------------|-------------|-------------|
| <b>Co<sub>5</sub>C<sub>2</sub></b> |             |             |             |
| Co                                 | -0.13311200 | -0.80210300 | -1.04289400 |

|    |             |             |             |
|----|-------------|-------------|-------------|
| Co | 0.47361100  | 1.30042900  | -0.35035100 |
| Co | 0.16002900  | -0.28789800 | 1.32377700  |
| C  | -1.89076000 | -1.30211500 | -0.50005900 |
| C  | -1.33379400 | -1.19321000 | 0.71663100  |
| Co | 1.99545600  | -0.25566200 | -0.03826900 |
| Co | -1.77941600 | 0.59975100  | 0.05961000  |
